# Supplementary material
Source: PubMed Central journal article supplement (PMC4286056)
Supplement: rspb20141887supp2.pdf [file rspb20141887supp2.pdf]

a) Olfactory trials

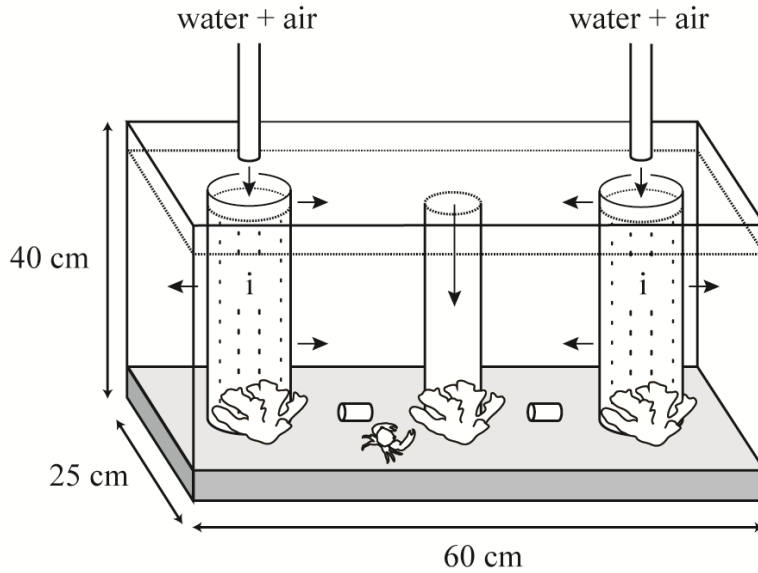

b) Predator trials

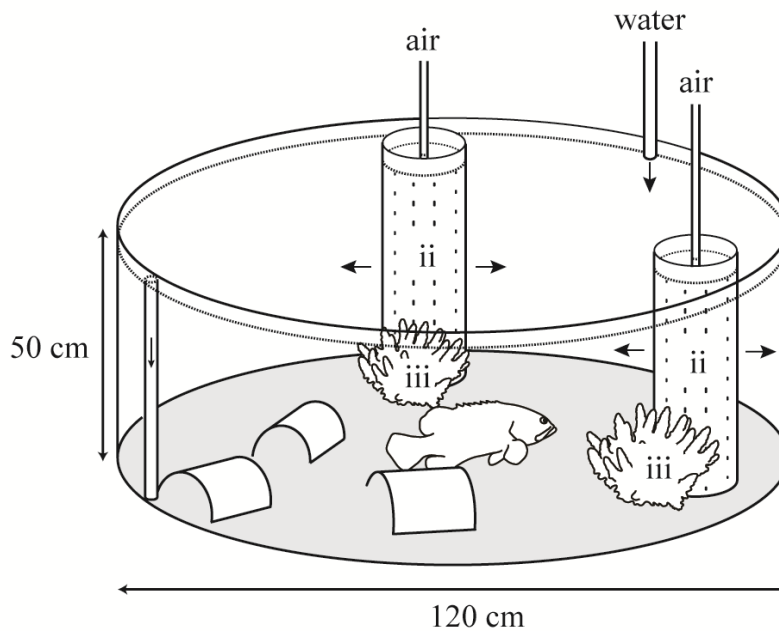

**Figure S2.** Diagrams of tank setups. a) shows the setup for the nocturnal olfactory trials using coral-dwelling crabs. A filefish or coral fragment was placed into each perforated tube (i). b) shows the setup for trials using predatory cod. A filefish fed a specific diet was placed into each of the perforated tubes (ii). Depending on the treatment, a specific coral was placed next to each perforated tube (iii). Arrows indicate water movement, as confirmed from dye trials.
